# Supplementary material for: Unzipped MWCNT/polypyrrole hybrid composites: a pathway to high-performance asymmetric supercapacitors
Source: Royal Society of Chemistry journal article supplement (doi:10.1039/d4ma01270d), 2025-01-01
Supplement: d4ma01270d1.pdf [file d4ma01270d1.pdf]

## Unzipped MWCNT/Polypyrrole Hybrid Composites: A Pathway to High-Performance Asymmetric Supercapacitors

Shilpa Simon<sup>[a]</sup>, Letcy V Theresa<sup>[a]</sup>, Sreeja P B<sup>[a]\*</sup>

<sup>[a]</sup> Department of Chemistry, Christ University, Bengaluru 560029, IN

\*Corresponding Author

E-mail: sreeja.pb@christuniversity.in,

<https://orcid.org/0000-0002-2106-7867>

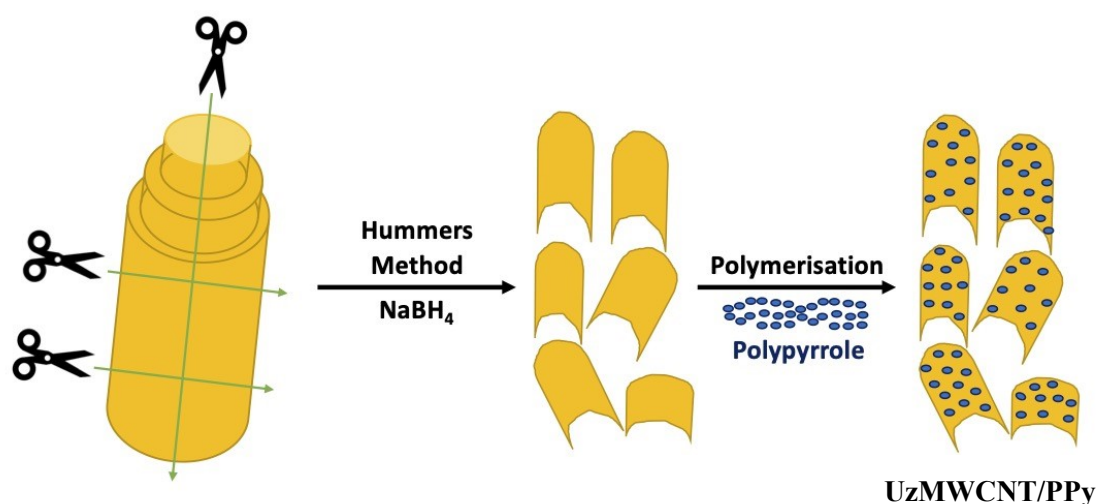

The Hummers method is a well-known procedure for oxidizing graphite. When the Hummers method is used on multi-walled carbon nanotubes (MWCNTs), the goal is typically to introduce functional groups onto the nanotubes to make them more dispersible or to create sites for further chemical reactions. If the method is used aggressively, it might lead to cutting or unzipping the nanotubes, but this isn't the primary intention of the standard Hummers method. We try to cut and unzip MWCNTs by this method.

## CV graph of UzMWCNT

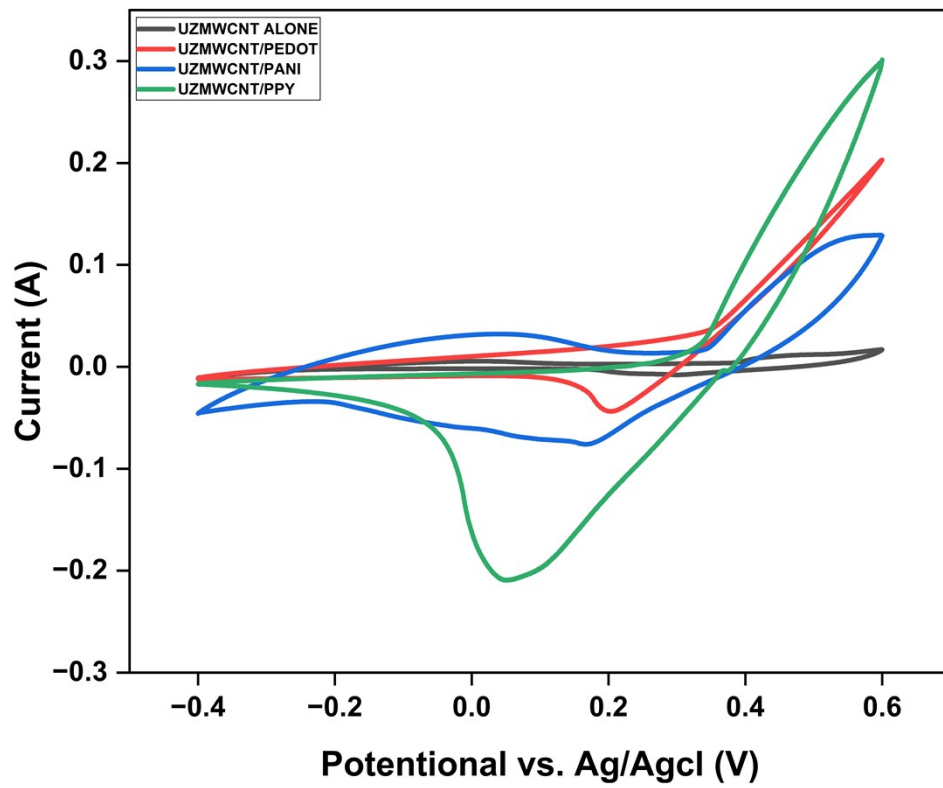

UzMWCNT with different conducting polymers
